# Supplementary material for: Functionally diverse heteromeric traps for ligands of the transforming growth factor-β superfamily
Source: PubMed Central journal article supplement (PMC8443706; doi:10.1038/s41598-021-97203-9), 2021-09-15
Supplement: 41598_2021_97203_MOESM1_ESM.pdf [file 41598_2021_97203_MOESM1_ESM.pdf]

# Functionally diverse heteromeric traps for ligands of the transforming growth factor- $\beta$ superfamily

Ravindra Kumar<sup>1</sup>, Asya V. Grinberg<sup>1,2</sup>, Huiming Li<sup>1</sup>, Tzu-Hsing Kuo<sup>1</sup>, Dianne Sako<sup>1</sup>, Lavanya Krishnan<sup>1</sup>, Katia Liharska<sup>1,2</sup>, Jia Li<sup>1</sup>, Rosa Grenha<sup>1</sup>, Michelle C. Maguire<sup>1</sup>, Steven D. Briscoe<sup>1</sup>, R. Scott Pearsall<sup>1,3</sup>, Brantley R. Herrin<sup>1</sup>, Rajasekhar N.V.S. Suragani<sup>1\*</sup>, Roselyne Castonguay<sup>1\*</sup>

<sup>1</sup>Acceleron Pharma, Cambridge, Massachusetts, USA

<sup>2</sup>Current affiliation: Dragonfly Therapeutics, Waltham, Massachusetts, USA

<sup>3</sup>Current affiliation: Cellarity, Cambridge, Massachusetts, USA

\*Corresponding authors

rsuragani@acceleronpharma.com

rcastonguay@acceleronpharma.com

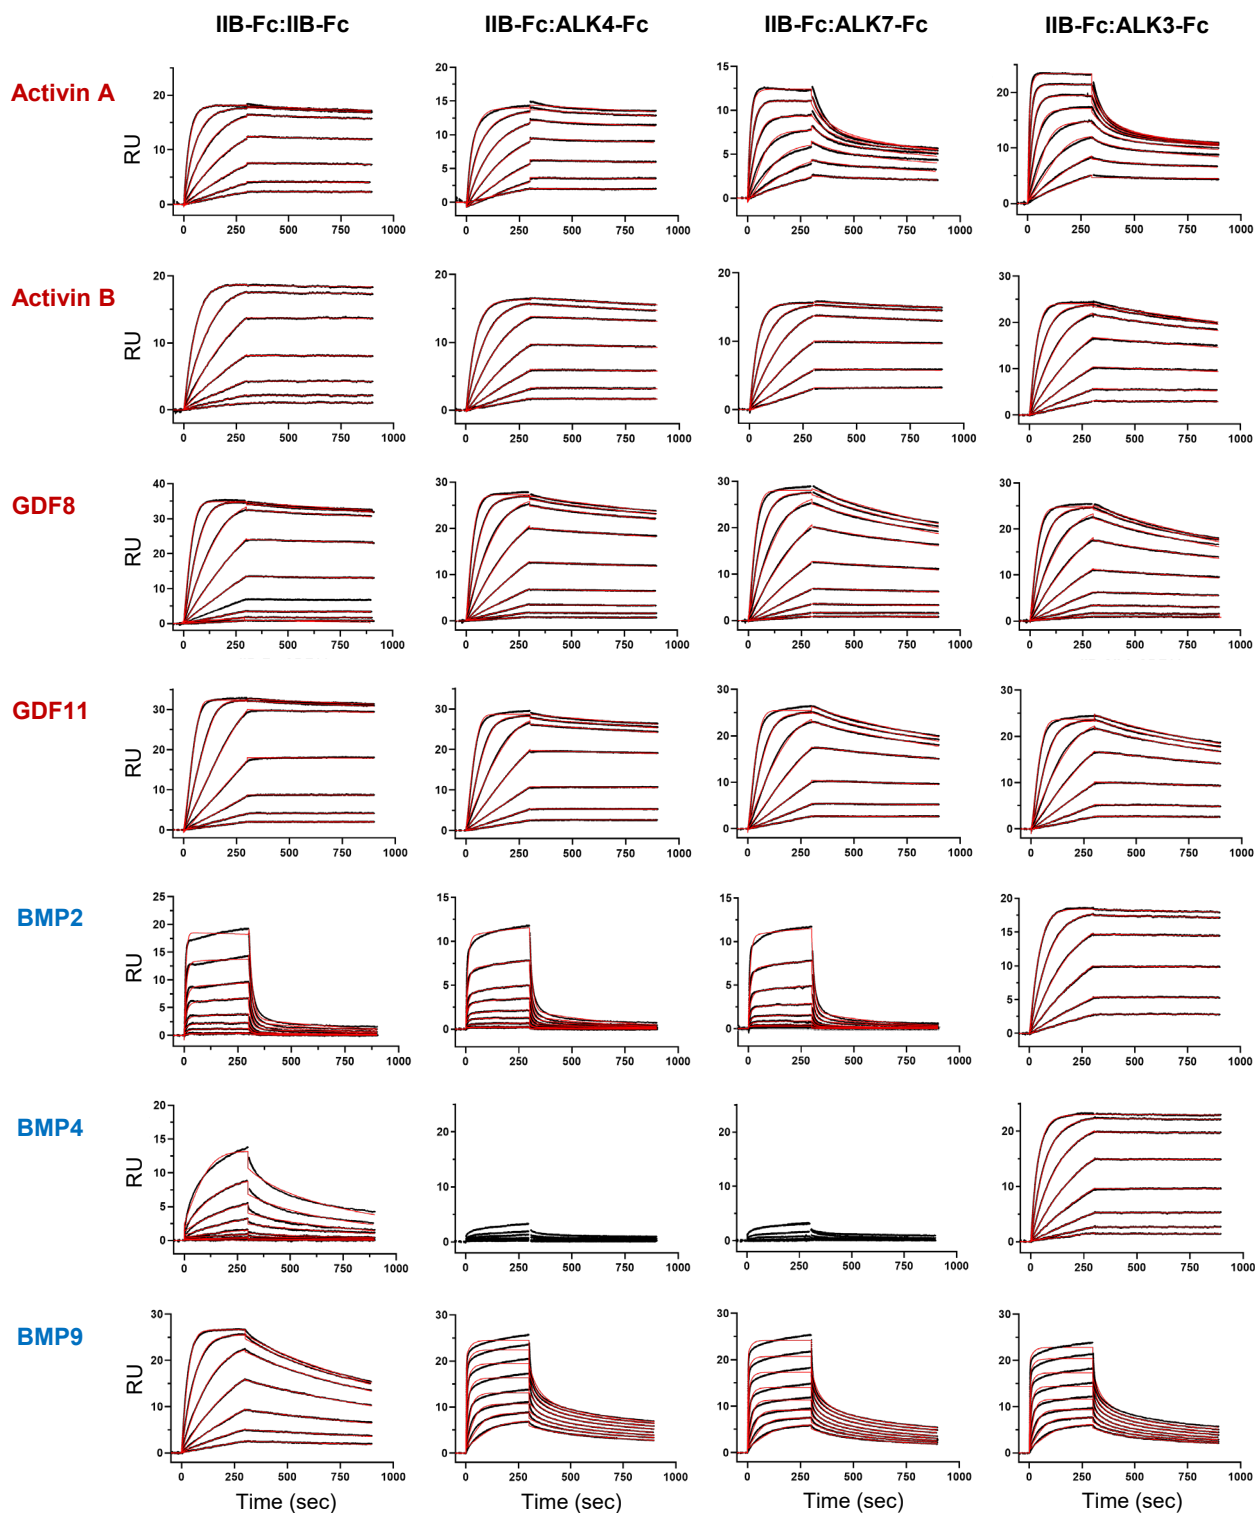

**Supplemental Figure 1.** Representative SPR sensorgrams for the homodimer IIB-Fc:IIB-Fc and heterodimers IIB-Fc:ALK4-Fc, IIB-Fc:ALK7-Fc, and IIB-Fc:ALK3-Fc evaluated with individual SMAD2/3-pathway ligands (red) and SMAD1/5/8-pathway ligands (blue) to determine values for kinetic parameters shown in Table 1. Sensorgrams (black lines) are overlaid in most cases with fits to a 1:1 interaction model with mass transport limitations or in certain cases (identified in Table 1) with fits to a bivalent analyte model (red lines in all cases). The range of ligand concentrations used for curve fitting are indicated for each construct-ligand combination in Supplemental Table 1. RU, resonance unit.

**Supplemental Table 1.** Ligand concentration ranges used for curve fitting for all combinations of ligands and constructs.

| Ligand           | Reference         | Heterodimers       |                    |                    |                     | Homodimers          |                     |          |
|------------------|-------------------|--------------------|--------------------|--------------------|---------------------|---------------------|---------------------|----------|
|                  | IIB-Fc:<br>IIB-Fc | IIB-Fc:<br>ALK4-Fc | IIB-Fc:<br>ALK7-Fc | IIB-Fc:<br>ALK3-Fc | ALK4-Fc:<br>ALK4-Fc | ALK7-Fc:<br>ALK7-Fc | ALK3-Fc:<br>ALK3-Fc |          |
|                  | <b>Activin A</b>  | 0.078–5            | 0.078–5            | 0.156–20           | 0.156–20            | 0.78–100            | 0.78–100            | 0.78–100 |
| <b>Activin B</b> | 0.078–5           | 0.078–5            | 0.156–5            | 0.156–10           | 0.39–50             | 0.39–50             | 0.39–50             |          |
| <b>GDF3</b>      | 0.625–20          | 0.625–80           | 0.625–80           | 0.625–80           | 0.625–80            | 0.625–80            | 0.625–80            |          |
| <b>GDF8</b>      | 0.078–20          | 0.078–20           | 0.078–20           | 0.078–20           | 0.39–100            | 0.39–100            | 0.39–100            |          |
| <b>GDF11</b>     | 0.078–5           | 0.078–5            | 0.078–5            | 0.078–5            | 0.39–100            | 0.39–100            | 0.39–100            |          |
| <b>BMP2</b>      | 0.156–40          | 0.156–40           | 0.156–40           | 0.078–2.5          | 0.156–40            | 0.156–40            | 0.156–20            |          |
| <b>BMP4</b>      | 0.156–40          | 0.156–40           | 0.156–40           | 0.078–10           | 0.156–40            | 0.156–40            | 0.156–40            |          |
| <b>BMP6</b>      | 0.078–10          | 0.312–40           | 0.312–40           | 0.078–10           | 0.312–40            | 0.312–40            | 0.312–40            |          |
| <b>BMP7</b>      | 0.312–20          | 0.312–20           | 0.312–20           | 0.078–10           | 0.312–20            | 0.312–20            | 0.312–20            |          |
| <b>BMP9</b>      | 0.078–5           | 0.78–100           | 0.78–100           | 0.78–100           | 0.78–100            | 0.78–100            | 0.78–100            |          |
| <b>BMP10</b>     | 0.039–2.5         | 0.039–5            | 0.039–5            | 0.039–2.5          | 0.39–100            | 0.39–100            | 0.39–100            |          |

Units are expressed as nM.

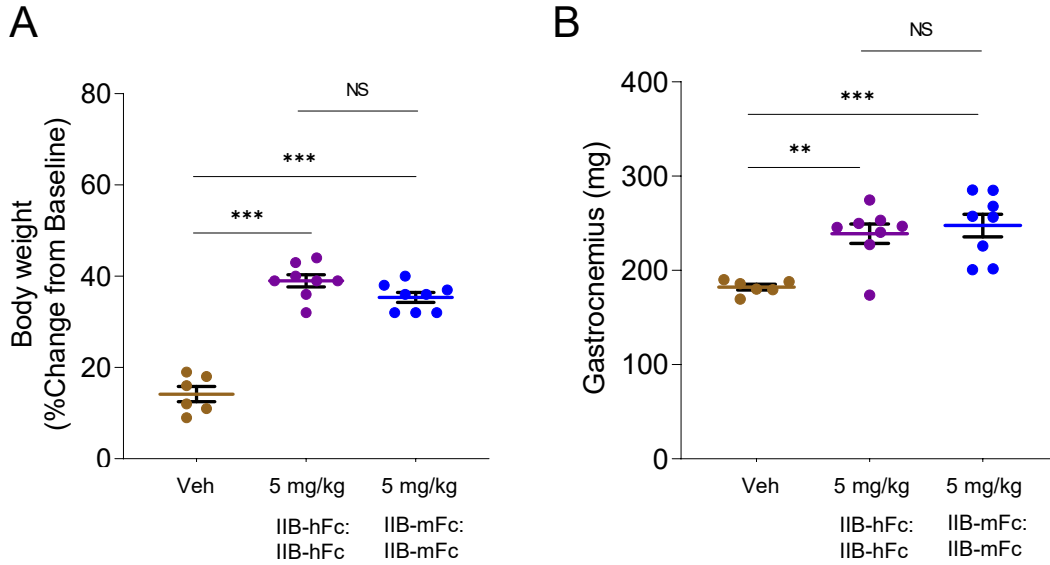

**Supplemental Figure 2.** Activity of IIB-hFc:IIB-hFc (human Fc) and IIB-mFc:IIB-mFc (mouse Fc) homodimers in wild-type mice. Twelve-week-old wild-type C57BL/6 mice were injected s.c. with IIB-hFc:IIB-hFc ( $n = 8$ , 5 mg/kg), IIB-mFc:IIB-mFc ( $n = 8$ , 5 mg/kg), or vehicle control ( $n = 6$ , PBS) twice weekly for 8 weeks. **(A)** Percentage change in mouse total body weight from baseline to end of 8 weeks. **(B)** Weight of the gastrocnemius muscle isolated by dissection on study termination at the end of 8 weeks. Veh, vehicle; mg/kg, milligrams per kilogram; NS, not significant.  $**P < 0.01$ ,  $***P < 0.001$ .

**Supplemental Table 2.** Supplemental statistics for Figure 4.

|                                    | Parameter         | Vehicle | IIB-Fc:<br>IIB-Fc:<br>10 mg/kg | IIB-Fc:<br>ALK4-Fc<br>3 mg/kg | IIB-Fc:<br>ALK4-Fc<br>10 mg/kg |
|------------------------------------|-------------------|---------|--------------------------------|-------------------------------|--------------------------------|
|                                    | Number of animals | 9       | 9                              | 9                             | 9                              |
| Body weight<br>(% change)          | Mean              | 14.95   | 38.47                          | 33.42                         | 41.55                          |
|                                    | Std. dev.         | 3.91    | 4.48                           | 8.84                          | 6.03                           |
|                                    | SEM               | 1.3     | 1.49                           | 2.95                          | 2.01                           |
|                                    | Lower 95% CI      | 11.95   | 35.03                          | 26.62                         | 36.91                          |
|                                    | Upper 95% CI      | 17.95   | 41.92                          | 40.21                         | 46.18                          |
| Gastrocnemius weight               | Mean              | 152.9   | 230.6                          | 209.3                         | 234.4                          |
|                                    | Std. dev.         | 13.1    | 25.97                          | 19.74                         | 27                             |
|                                    | SEM               | 4.37    | 8.66                           | 6.58                          | 9                              |
|                                    | Lower 95% CI      | 142.9   | 210.7                          | 194.2                         | 213.6                          |
|                                    | Upper 95% CI      | 163     | 250.6                          | 224.5                         | 255.2                          |
| Body fat<br>(% change)             | Mean              | 0.22    | -3.51                          | -3.74                         | -3.34                          |
|                                    | Std. dev.         | 1.91    | 1                              | 1.18                          | 1.36                           |
|                                    | SEM               | 0.64    | 0.33                           | 0.39                          | 0.45                           |
|                                    | Lower 95% CI      | -1.25   | -4.28                          | -4.65                         | -4.39                          |
|                                    | Upper 95% CI      | 1.69    | -2.74                          | -2.84                         | -2.3                           |
| Bone mineral density<br>(% change) | Mean              | 8.58    | 14.29                          | 11.18                         | 11.61                          |
|                                    | Std. dev.         | 2.81    | 5.06                           | 5.62                          | 2.83                           |
|                                    | SEM               | 0.94    | 1.69                           | 1.88                          | 0.94                           |
|                                    | Lower 95% CI      | 6.42    | 10.4                           | 6.85                          | 9.43                           |
|                                    | Upper 95% CI      | 10.74   | 18.17                          | 15.5                          | 13.79                          |

Std. dev., standard deviation; SEM, standard error of the mean;  
CI, confidence interval

**Supplemental Table 3.** Supplemental statistics for Figure 5.

|                                        | Parameter         | Vehicle | IIB-Fc:<br>IIB-Fc:<br>10 mg/kg | IIB-Fc:<br>ALK7-Fc<br>3 mg/kg | IIB-Fc:<br>ALK7-Fc<br>10 mg/kg | IIB-Fc:<br>ALK3-Fc<br>3 mg/kg | IIB-Fc:<br>ALK3-Fc<br>10 mg/kg |
|----------------------------------------|-------------------|---------|--------------------------------|-------------------------------|--------------------------------|-------------------------------|--------------------------------|
|                                        | Number of animals | 7       | 8                              | 8                             | 8                              | 7                             | 8                              |
| Body weight<br><br>(% change)          | Mean              | 6.89    | 30.24                          | 18.58                         | 27.22                          | 12.26                         | 18.17                          |
|                                        | Std. dev.         | 1.4     | 3.04                           | 3.77                          | 4.01                           | 2.99                          | 2.31                           |
|                                        | SEM               | 0.53    | 1.07                           | 1.33                          | 1.42                           | 1.13                          | 0.82                           |
|                                        | Lower 95% CI      | 5.6     | 27.7                           | 15.42                         | 23.87                          | 9.5                           | 16.24                          |
|                                        | Upper 95% CI      | 8.18    | 32.78                          | 21.73                         | 30.57                          | 15.03                         | 20.1                           |
| Gastrocnemius weight                   | Mean              | 169.8   | 247.4                          | 200.9                         | 215.5                          | 169                           | 181.8                          |
|                                        | Std. dev.         | 11.35   | 11.46                          | 14.63                         | 19.88                          | 18.6                          | 9.49                           |
|                                        | SEM               | 4.29    | 4.05                           | 5.17                          | 7.03                           | 7.03                          | 3.36                           |
|                                        | Lower 95% CI      | 159.3   | 237.8                          | 188.7                         | 198.8                          | 151.8                         | 173.8                          |
|                                        | Upper 95% CI      | 180.3   | 256.9                          | 213.1                         | 232.1                          | 186.2                         | 189.7                          |
| Body fat<br><br>(% change)             | Mean              | 1.03    | -1.7                           | 0.6                           | 0.48                           | 0.2                           | 7.9                            |
|                                        | Std. dev.         | 1.72    | 0.41                           | 1.48                          | 1.02                           | 0.78                          | 2.1                            |
|                                        | SEM               | 0.65    | 0.15                           | 0.52                          | 0.36                           | 0.29                          | 0.74                           |
|                                        | Lower 95% CI      | -0.56   | -2.04                          | -0.64                         | -0.38                          | -0.52                         | 6.14                           |
|                                        | Upper 95% CI      | 2.62    | -1.36                          | 1.84                          | 1.33                           | 0.92                          | 9.66                           |
| Bone mineral density<br><br>(% change) | Mean              | 3.89    | 7.2                            | 10.44                         | 9.85                           | 9.48                          | 10.03                          |
|                                        | Std. dev.         | 3.77    | 3.52                           | 7.15                          | 5.74                           | 6                             | 8.7                            |
|                                        | SEM               | 1.43    | 1.25                           | 2.53                          | 2.03                           | 2.27                          | 3.08                           |
|                                        | Lower 95% CI      | 0.4     | 4.25                           | 4.46                          | 5.06                           | 3.93                          | 2.76                           |
|                                        | Upper 95% CI      | 7.38    | 10.14                          | 16.41                         | 14.65                          | 15.03                         | 17.31                          |

Std. dev., standard deviation; SEM, standard error of the mean;  
CI, confidence interval

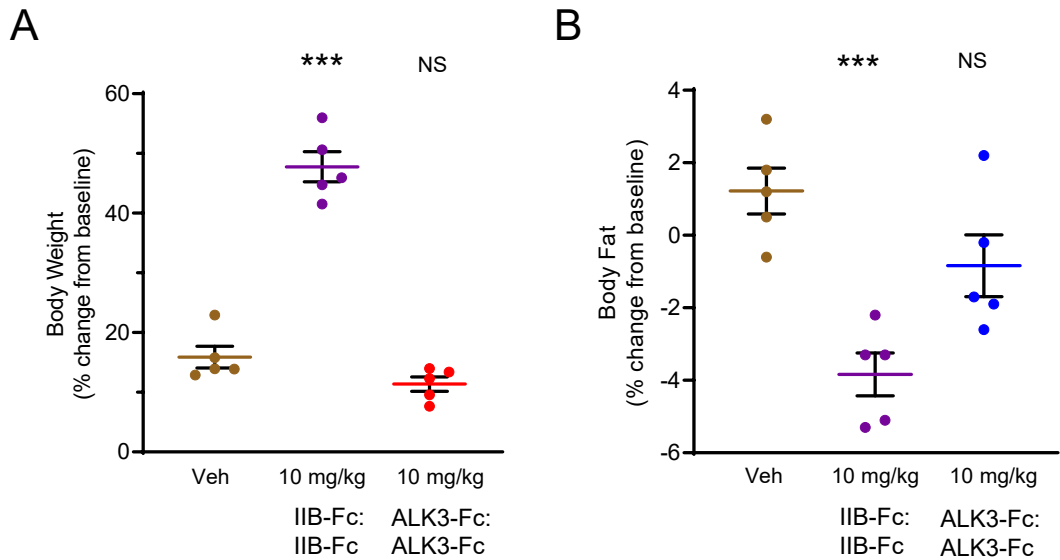

**Supplemental Figure 3.** Activity of ALK3-Fc:ALK3-Fc homodimer in wild-type mice. Ten-week-old wild-type C57BL/6 mice were injected s.c. with IIB-Fc:IIB-Fc ( $n = 5$ , 10 mg/kg), ALK3-Fc:ALK3-Fc ( $n = 5$ , 10 mg/kg), or vehicle control ( $n = 5$ , PBS) twice weekly for 28 days. **(A)** Percentage change in mouse total body weight from day -1 to day 28. **(B)** Percentage change in total fat mass normalized to body weight from day -1 to day 27 as assessed by NMR. Data are means  $\pm$  SEM. Veh, vehicle; mg/kg, milligrams per kilogram; NS, not significant. \*\*\*  $P < 0.001$ .
